# Supplementary material for: The EIMS fragmentation mechanisms of the sesquiterpenes corvol ethers A and B, epi-cubebol and isodauc-8-en-11-ol
Source: publisher site journal article supplement (doi:10.3762/bjoc.12.132), 2016-07-05
Supplement: Additional file 1 [file 1860-5397-12-132-S1.pdf]

# Supporting Information

for

## **The EIMS fragmentation mechanisms of the sesquiterpenes corvol ethers A and B, *epi*-cubebol and isodauc-8-en-11-ol**

Patrick Rabe and Jeroen S. Dickschat\*

Address: Kekulé-Institute of Organic Chemistry and Biochemistry, University of Bonn,  
Gerhard-Domagk-Straße 1, 53121 Bonn, Germany

Email: Jeroen S. Dickschat - [dickschat@uni-bonn.de](mailto:dickschat@uni-bonn.de)

\* Corresponding author

### **HRMS spectra**

Corvol ether A, MS<sup>2</sup>(179)

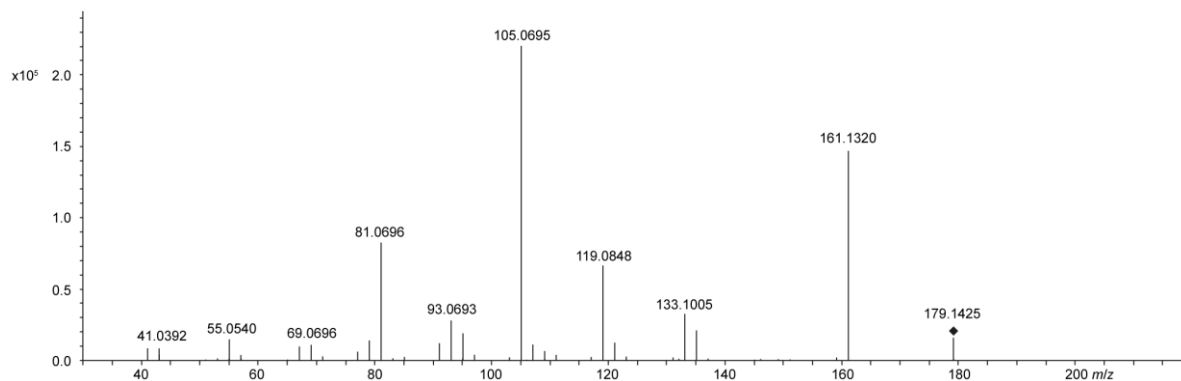

**Figure S1:** MS<sup>2</sup> for  $m/z = 179$  of **1**.

**Table S1:** Elemental compositions of fragment ions in Figure S1.

| molecular formula                                | $m/z$ found | $m/z$ calculated | $\Delta$ (ppm) |
|--------------------------------------------------|-------------|------------------|----------------|
| [C <sub>12</sub> H <sub>19</sub> O] <sup>+</sup> | 179.1425    | 179.1430         | -2.8           |
| [C <sub>12</sub> H <sub>17</sub> ] <sup>+</sup>  | 161.1320    | 161.1325         | -3.1           |
| [C <sub>10</sub> H <sub>13</sub> ] <sup>+</sup>  | 133.1005    | 133.1012         | +5.3           |
| [C <sub>9</sub> H <sub>11</sub> ] <sup>+</sup>   | 119.0848    | 119.0855         | +5.9           |
| [C <sub>8</sub> H <sub>9</sub> ] <sup>+</sup>    | 105.0695    | 105.0699         | +3.8           |
| [C <sub>7</sub> H <sub>9</sub> ] <sup>+</sup>    | 93.0693     | 93.0699          | +3.2           |
| [C <sub>6</sub> H <sub>9</sub> ] <sup>+</sup>    | 81.0696     | 81.0699          | +3.7           |
| [C <sub>5</sub> H <sub>9</sub> ] <sup>+</sup>    | 69.0696     | 69.0699          | +4.3           |
| [C <sub>4</sub> H <sub>7</sub> ] <sup>+</sup>    | 55.0540     | 55.0542          | +3.6           |
| [C <sub>3</sub> H <sub>5</sub> ] <sup>+</sup>    | 41.0392     | 41.0386          | +14.6          |

Corvol ether A, MS<sup>2</sup>(161)

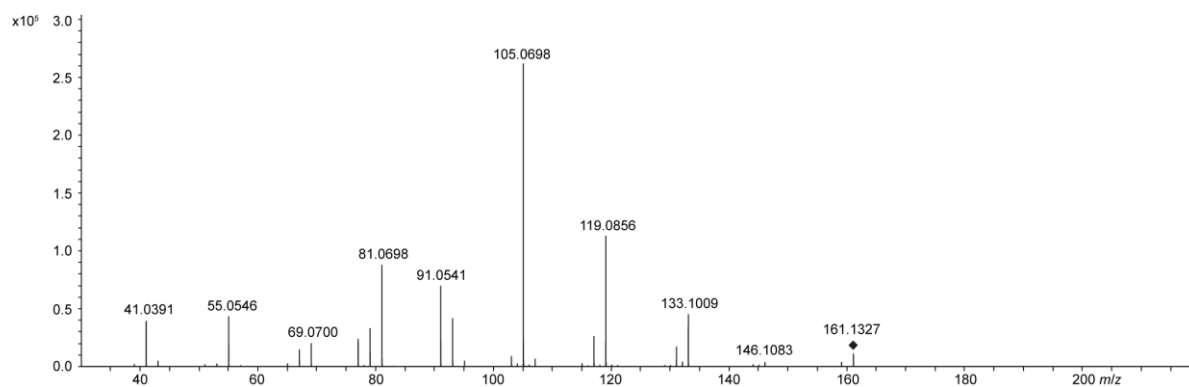

**Figure S2:** MS<sup>2</sup> for  $m/z = 161$  of **1**.

**Table S2:** Elemental compositions of fragment ions in Figure S2.

| molecular formula                               | $m/z$ found | $m/z$ calculated | $\Delta$ (ppm) |
|-------------------------------------------------|-------------|------------------|----------------|
| [C <sub>12</sub> H <sub>17</sub> ] <sup>+</sup> | 161.1327    | 161.1325         | +1.2           |
| [C <sub>11</sub> H <sub>14</sub> ] <sup>+</sup> | 146.1083    | 146.1090         | -4.8           |
| [C <sub>10</sub> H <sub>13</sub> ] <sup>+</sup> | 133.1009    | 133.1012         | -2.3           |
| [C <sub>9</sub> H <sub>11</sub> ] <sup>+</sup>  | 119.0856    | 119.0855         | +0.8           |
| [C <sub>8</sub> H <sub>9</sub> ] <sup>+</sup>   | 105.0698    | 105.0699         | -1.0           |
| [C <sub>7</sub> H <sub>7</sub> ] <sup>+</sup>   | 91.0541     | 91.0542          | -1.1           |
| [C <sub>6</sub> H <sub>9</sub> ] <sup>+</sup>   | 81.0698     | 81.0699          | -1.2           |
| [C <sub>5</sub> H <sub>9</sub> ] <sup>+</sup>   | 69.0700     | 69.0699          | +1.4           |
| [C <sub>4</sub> H <sub>7</sub> ] <sup>+</sup>   | 55.0546     | 55.0542          | +7.3           |
| [C <sub>3</sub> H <sub>5</sub> ] <sup>+</sup>   | 41.0391     | 41.0386          | +12.2          |

A) (1-<sup>13</sup>C)Corvol ether A, MS<sup>2</sup>(180)

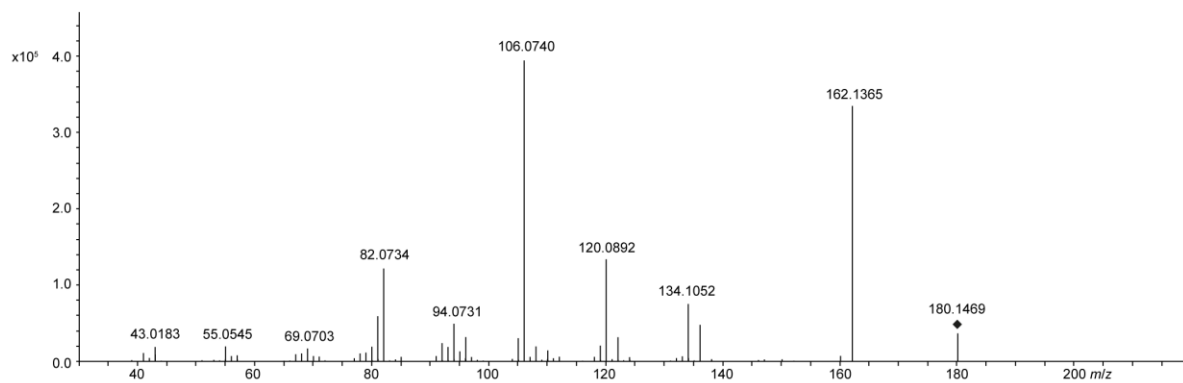

B) (2-<sup>13</sup>C)Corvol ether A, MS<sup>2</sup>(180)

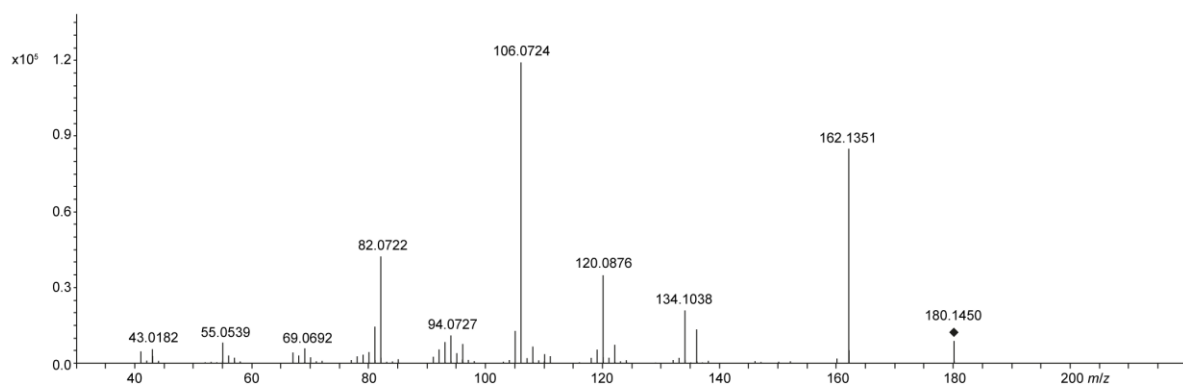

C) (3-<sup>13</sup>C)Corvol ether A, MS<sup>2</sup>(180)

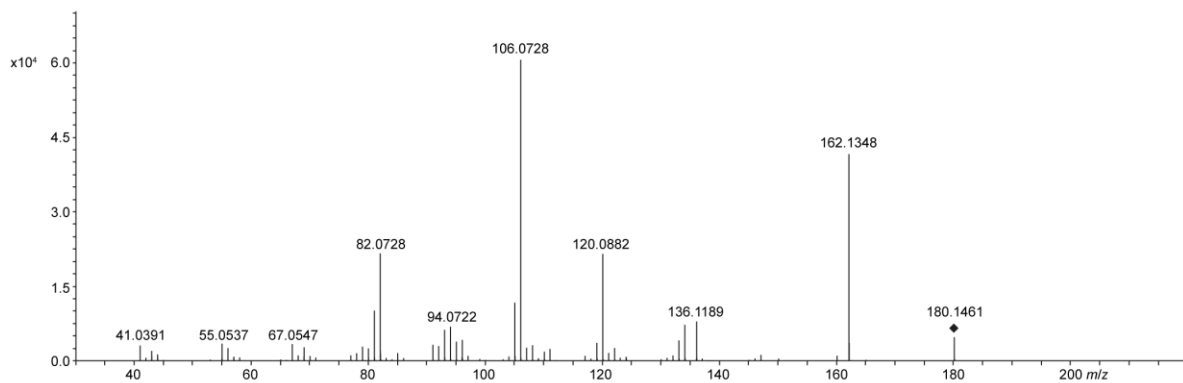

D) (4-<sup>13</sup>C)Corvol ether A, MS<sup>2</sup>(180)

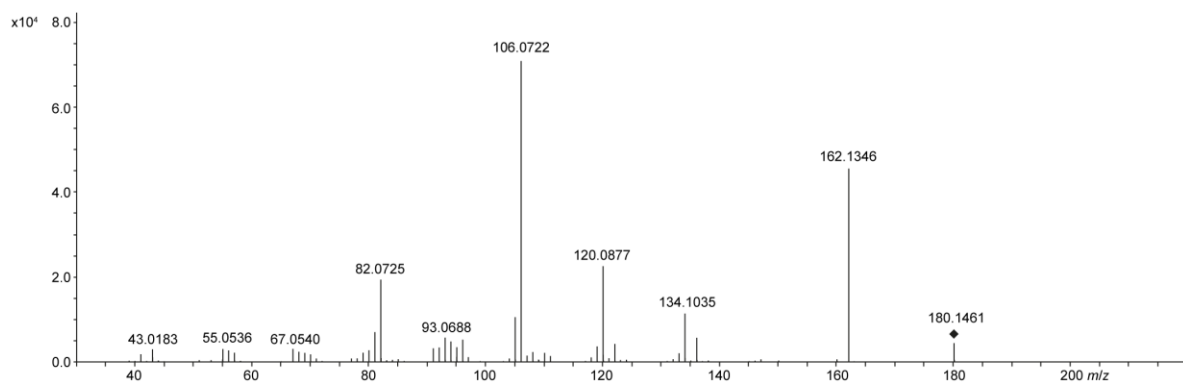

**Figure S3:** MS<sup>2</sup> for m/z = 180 of A) (1-<sup>13</sup>C)-1, B) (2-<sup>13</sup>C)-1, C) (3-<sup>13</sup>C)-1, D) (4-<sup>13</sup>C)-1.

E) (5-<sup>13</sup>C)Corvol ether A, MS<sup>2</sup>(180)

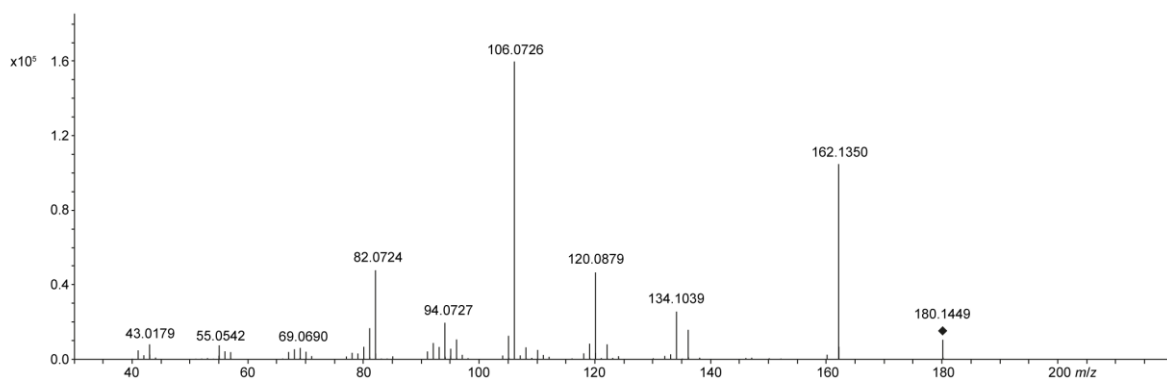

F) (6-<sup>13</sup>C)Corvol ether A, MS<sup>2</sup>(180)

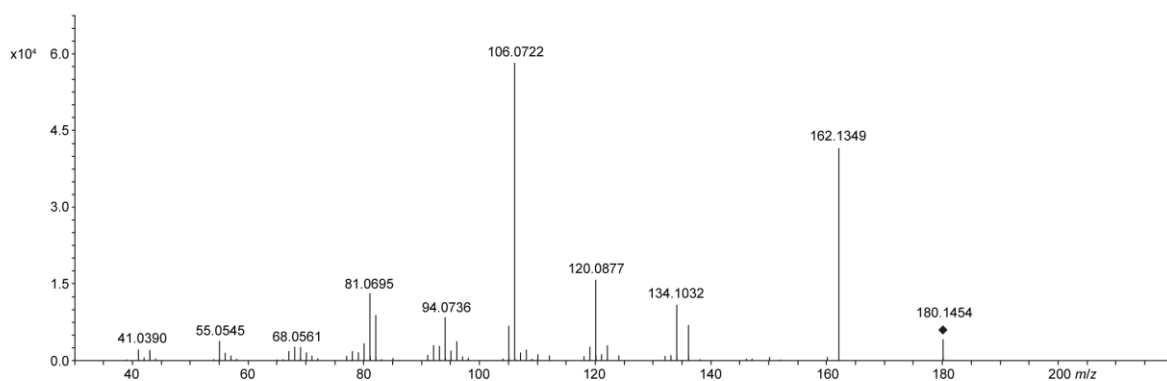

G) (7-<sup>13</sup>C)Corvol ether A, MS<sup>2</sup>(180)

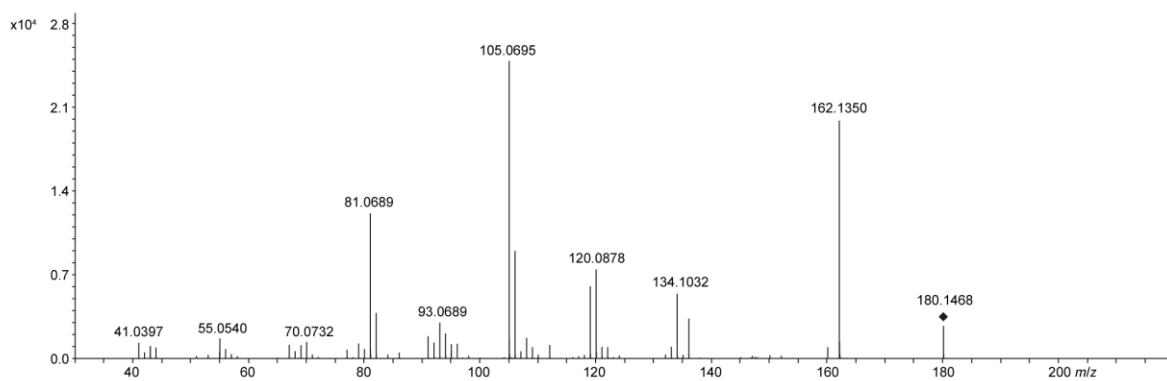

H) (8-<sup>13</sup>C)Corvol ether A, MS<sup>2</sup>(180)

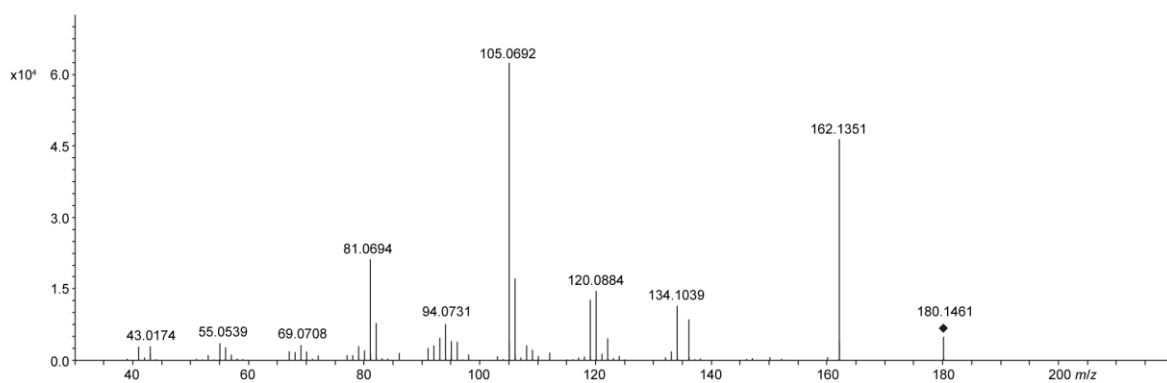

**Figure S3:** MS<sup>2</sup> for *m/z* = 180 of E) (5-<sup>13</sup>C)-1, F) (6-<sup>13</sup>C)-1, G) (7-<sup>13</sup>C)-1, H) (8-<sup>13</sup>C)-1.

I) (9-<sup>13</sup>C)Corvol ether A, MS<sup>2</sup>(180)

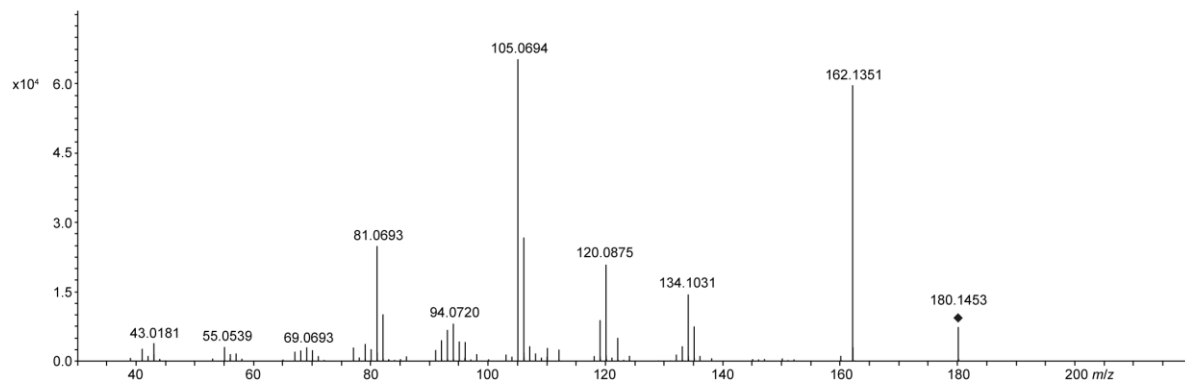

J) (10-<sup>13</sup>C)Corvol ether A, MS<sup>2</sup>(180)

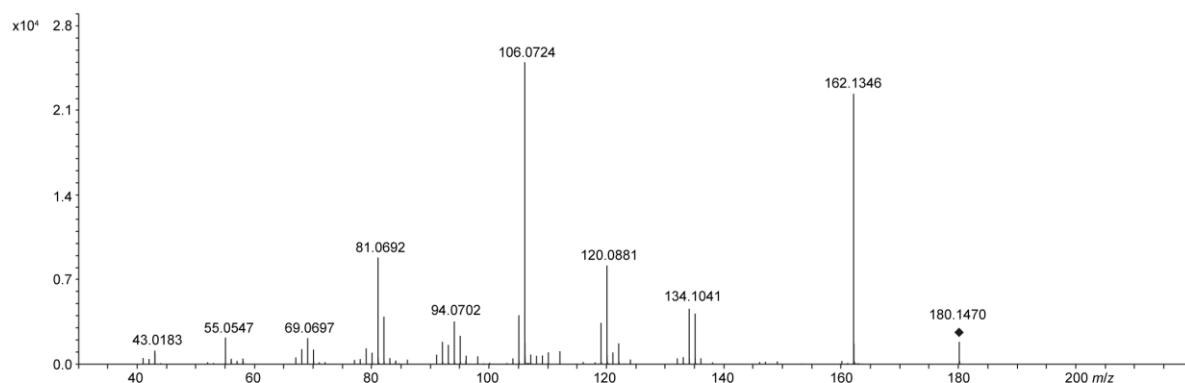

K) (14-<sup>13</sup>C)Corvol ether A, MS<sup>2</sup>(180)

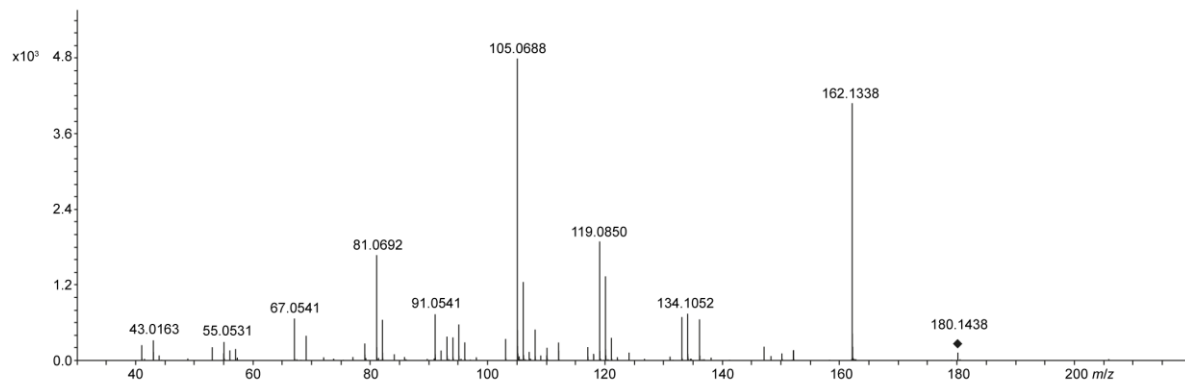

L) (15-<sup>13</sup>C)Corvol ether A, MS<sup>2</sup>(180)

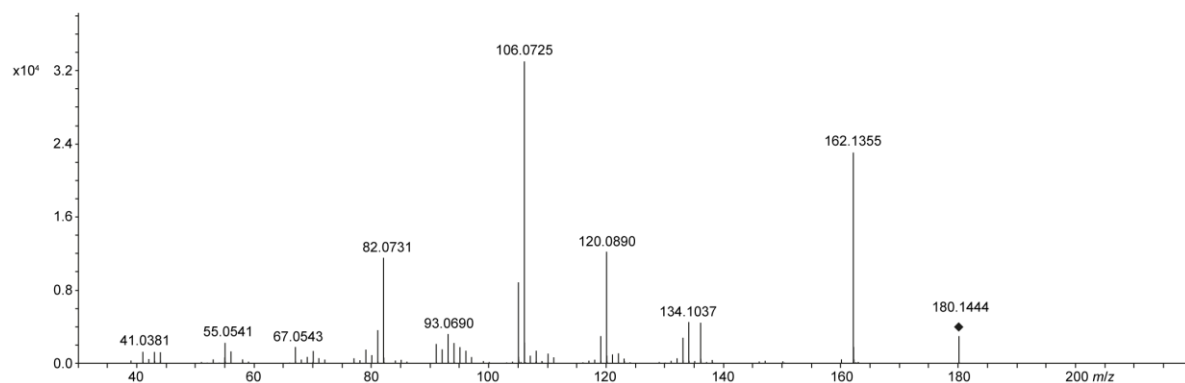

**Figure S3:** MS<sup>2</sup> for *m/z* = 180 of I) (9-<sup>13</sup>C)-1, J) (10-<sup>13</sup>C)-1, K) (14-<sup>13</sup>C)-1, L) (15-<sup>13</sup>C)-1.

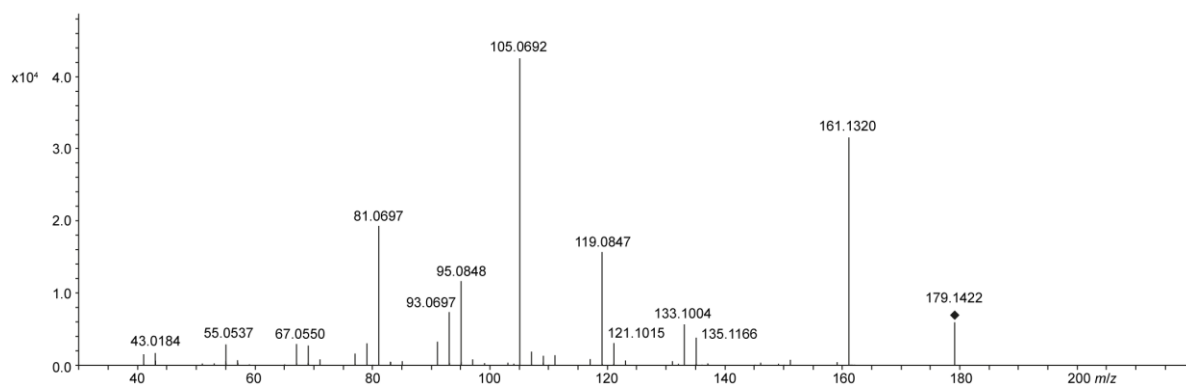

**Figure S4:** MS<sup>2</sup> for  $m/z = 179$  of **2**.

**Table S3:** Elemental compositions of fragment ions in Figure S4.

| molecular formula                                | $m/z$ found | $m/z$ calculated | $\Delta$ (ppm) |
|--------------------------------------------------|-------------|------------------|----------------|
| [C <sub>12</sub> H <sub>19</sub> O] <sup>+</sup> | 179.1422    | 179.1430         | -4.5           |
| [C <sub>12</sub> H <sub>17</sub> ] <sup>+</sup>  | 161.1320    | 161.1325         | -3.1           |
| [C <sub>10</sub> H <sub>13</sub> ] <sup>+</sup>  | 133.1004    | 133.1012         | -6.0           |
| [C <sub>9</sub> H <sub>11</sub> ] <sup>+</sup>   | 119.0847    | 119.0855         | -6.7           |
| [C <sub>8</sub> H <sub>9</sub> ] <sup>+</sup>    | 105.0692    | 105.0699         | -6.7           |
| [C <sub>7</sub> H <sub>11</sub> ] <sup>+</sup>   | 95.0848     | 95.0855          | -7.4           |
| [C <sub>6</sub> H <sub>9</sub> ] <sup>+</sup>    | 81.0697     | 81.0699          | -2.5           |
| [C <sub>5</sub> H <sub>7</sub> ] <sup>+</sup>    | 67.0550     | 67.0542          | +11.9          |
| [C <sub>4</sub> H <sub>7</sub> ] <sup>+</sup>    | 55.0540     | 55.0542          | -3.6           |
| [C <sub>2</sub> H <sub>3</sub> O] <sup>+</sup>   | 43.0184     | 43.0179          | +11.6          |

Corvol ether B, MS<sup>2</sup>(161)

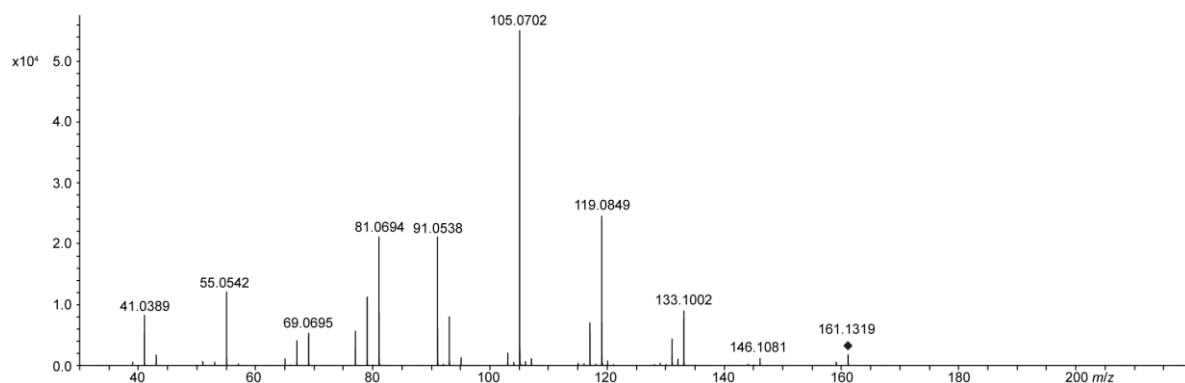

**Figure S5:** MS<sup>2</sup> for  $m/z = 161$  of **2**.

**Table S4:** Elemental compositions of fragment ions in Figure S5.

| molecular formula                               | $m/z$ found | $m/z$ calculated | $\Delta$ (ppm) |
|-------------------------------------------------|-------------|------------------|----------------|
| [C <sub>12</sub> H <sub>17</sub> ] <sup>+</sup> | 161.1319    | 161.1325         | -3.7           |
| [C <sub>10</sub> H <sub>13</sub> ] <sup>+</sup> | 133.1002    | 133.1012         | -7.5           |
| [C <sub>9</sub> H <sub>11</sub> ] <sup>+</sup>  | 119.0849    | 119.0855         | -5.0           |
| [C <sub>8</sub> H <sub>9</sub> ] <sup>+</sup>   | 105.0702    | 105.0699         | +2.9           |
| [C <sub>7</sub> H <sub>7</sub> ] <sup>+</sup>   | 91.0538     | 91.0542          | -4.4           |
| [C <sub>6</sub> H <sub>9</sub> ] <sup>+</sup>   | 81.0694     | 81.0699          | -6.2           |
| [C <sub>5</sub> H <sub>9</sub> ] <sup>+</sup>   | 69.0695     | 69.0699          | -5.8           |
| [C <sub>4</sub> H <sub>7</sub> ] <sup>+</sup>   | 55.0542     | 55.0542          | 0.0            |
| [C <sub>3</sub> H <sub>5</sub> ] <sup>+</sup>   | 41.0389     | 41.0386          | +7.3           |



Corvol ether B, MS<sup>2</sup>(150)

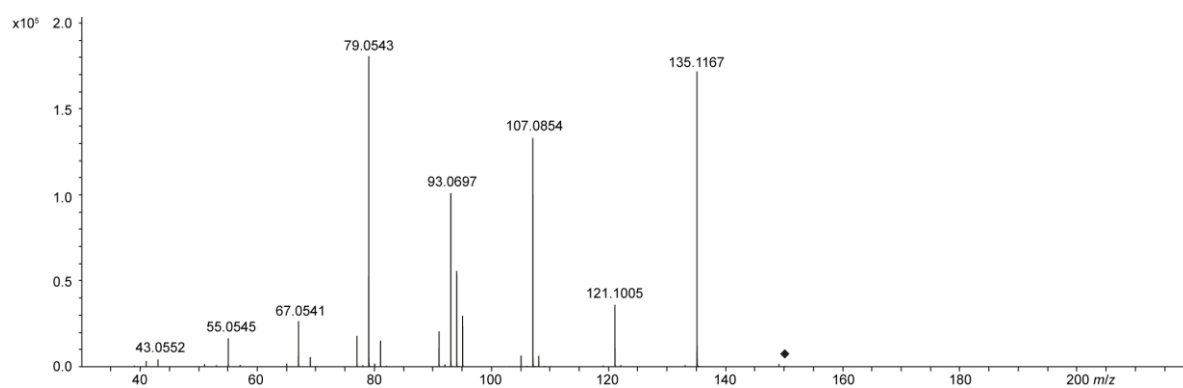

**Figure S6:** MS<sup>2</sup> for  $m/z = 150$  of **2**.

**Table S5:** Elemental compositions of fragment ions in Figure S6.

| molecular formula                               | $m/z$ found | $m/z$ calculated | $\Delta$ (ppm) |
|-------------------------------------------------|-------------|------------------|----------------|
| [C <sub>10</sub> H <sub>15</sub> ] <sup>+</sup> | 135.1167    | 135.1168         | -0.7           |
| [C <sub>9</sub> H <sub>13</sub> ] <sup>+</sup>  | 121.1005    | 121.1012         | -5.8           |
| [C <sub>8</sub> H <sub>11</sub> ] <sup>+</sup>  | 107.0854    | 107.0855         | -0.9           |
| [C <sub>7</sub> H <sub>9</sub> ] <sup>+</sup>   | 93.0697     | 93.0699          | -2.1           |
| [C <sub>6</sub> H <sub>7</sub> ] <sup>+</sup>   | 79.0543     | 79.0542          | +1.2           |
| [C <sub>5</sub> H <sub>7</sub> ] <sup>+</sup>   | 67.0541     | 67.0542          | -1.5           |
| [C <sub>4</sub> H <sub>7</sub> ] <sup>+</sup>   | 55.0545     | 55.0542          | +5.4           |
| [C <sub>3</sub> H <sub>7</sub> ] <sup>+</sup>   | 43.0552     | 43.0542          | +23.2          |

*epi*-Cubebol, MS<sup>2</sup>(204)

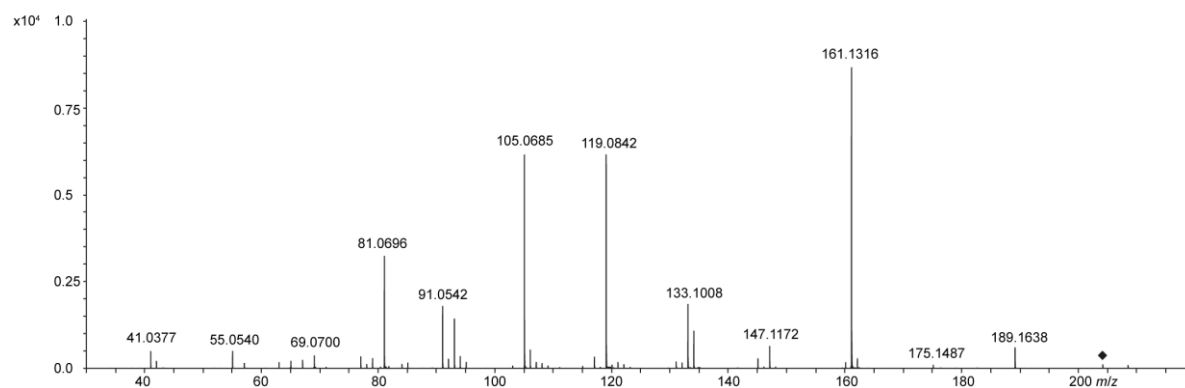

**Figure S7:** MS<sup>2</sup> for  $m/z = 204$  of **3**.

**Table S6:** Elemental compositions of fragment ions in Figure S7.

| molecular formula                               | $m/z$ found | $m/z$ calculated | $\Delta$ (ppm) |
|-------------------------------------------------|-------------|------------------|----------------|
| [C <sub>14</sub> H <sub>21</sub> ] <sup>+</sup> | 189.1638    | 189.1638         | 0.0            |
| [C <sub>13</sub> H <sub>19</sub> ] <sup>+</sup> | 175.1487    | 175.1482         | +2.9           |
| [C <sub>12</sub> H <sub>17</sub> ] <sup>+</sup> | 161.1316    | 161.1325         | -5.6           |
| [C <sub>11</sub> H <sub>15</sub> ] <sup>+</sup> | 147.1172    | 147.1168         | +2.7           |
| [C <sub>10</sub> H <sub>13</sub> ] <sup>+</sup> | 133.1008    | 133.1012         | -3.0           |
| [C <sub>9</sub> H <sub>11</sub> ] <sup>+</sup>  | 119.0842    | 119.0855         | -10.9          |
| [C <sub>8</sub> H <sub>9</sub> ] <sup>+</sup>   | 105.0685    | 105.0699         | -13.3          |
| [C <sub>7</sub> H <sub>7</sub> ] <sup>+</sup>   | 91.0542     | 91.0542          | 0.0            |
| [C <sub>6</sub> H <sub>9</sub> ] <sup>+</sup>   | 81.0696     | 81.0699          | -3.7           |
| [C <sub>5</sub> H <sub>9</sub> ] <sup>+</sup>   | 69.0700     | 69.0699          | +1.4           |
| [C <sub>4</sub> H <sub>7</sub> ] <sup>+</sup>   | 55.0540     | 55.0542          | -3.6           |
| [C <sub>3</sub> H <sub>5</sub> ] <sup>+</sup>   | 41.0377     | 41.0386          | -21.9          |

*epi*-Cubebol, MS<sup>2</sup>(179)

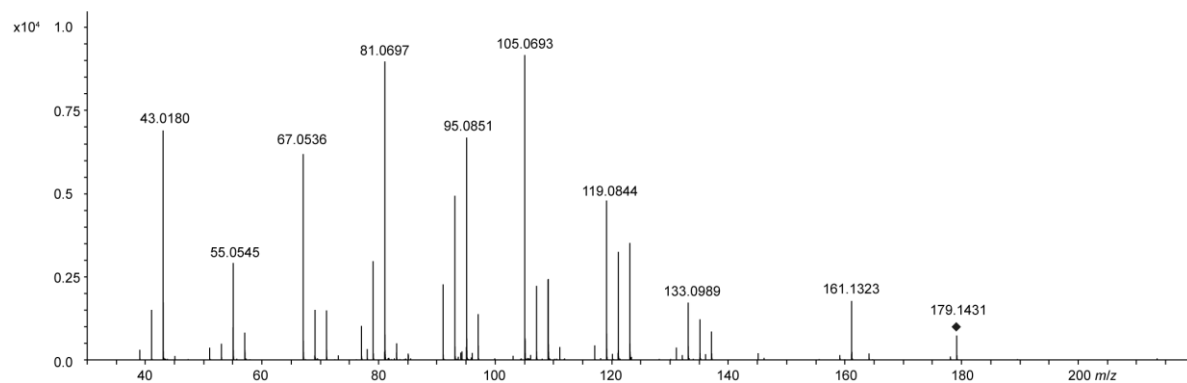

**Figure S8:** MS<sup>2</sup> for  $m/z = 179$  of **3**.

**Table S7:** Elemental compositions of fragment ions in Figure S8.

| molecular formula                                | $m/z$ found | $m/z$ calculated | $\Delta$ (ppm) |
|--------------------------------------------------|-------------|------------------|----------------|
| [C <sub>12</sub> H <sub>19</sub> O] <sup>+</sup> | 179.1431    | 179.1430         | +0.6           |
| [C <sub>12</sub> H <sub>17</sub> ] <sup>+</sup>  | 161.1323    | 161.1325         | -1.2           |
| [C <sub>10</sub> H <sub>13</sub> ] <sup>+</sup>  | 133.1008    | 133.1012         | -3.0           |
| [C <sub>9</sub> H <sub>11</sub> ] <sup>+</sup>   | 119.0844    | 119.0855         | -9.2           |
| [C <sub>8</sub> H <sub>9</sub> ] <sup>+</sup>    | 105.0693    | 105.0699         | -5.7           |
| [C <sub>7</sub> H <sub>11</sub> ] <sup>+</sup>   | 95.0851     | 95.0855          | -4.2           |
| [C <sub>6</sub> H <sub>9</sub> ] <sup>+</sup>    | 81.0697     | 81.0699          | -2.5           |
| [C <sub>5</sub> H <sub>7</sub> ] <sup>+</sup>    | 67.0536     | 67.0542          | -8.9           |
| [C <sub>4</sub> H <sub>7</sub> ] <sup>+</sup>    | 55.0545     | 55.0542          | +5.4           |
| [C <sub>2</sub> H <sub>3</sub> O] <sup>+</sup>   | 43.0180     | 43.0179          | +2.3           |

Isodauc-8-en-11-ol, MS<sup>2</sup>(207)

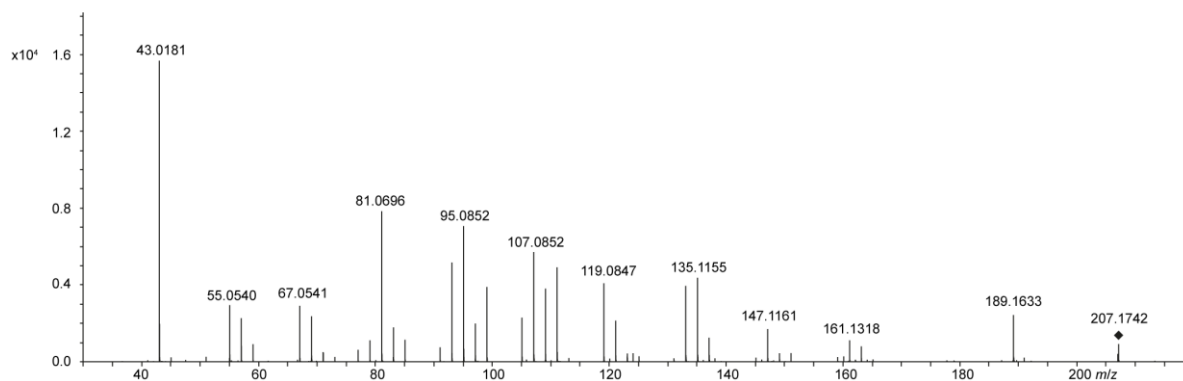

**Figure S9:** MS<sup>2</sup> for  $m/z = 207$  of **4**.

**Table S8:** Elemental compositions of fragment ions in Figure S9.

| molecular formula                                | $m/z$ found | $m/z$ calculated | $\Delta$ (ppm) |
|--------------------------------------------------|-------------|------------------|----------------|
| [C <sub>14</sub> H <sub>23</sub> O] <sup>+</sup> | 207.1742    | 207.1743         | -0.5           |
| [C <sub>14</sub> H <sub>21</sub> ] <sup>+</sup>  | 189.1633    | 189.1638         | -2.6           |
| [C <sub>12</sub> H <sub>17</sub> ] <sup>+</sup>  | 161.1318    | 161.1325         | -4.3           |
| [C <sub>11</sub> H <sub>15</sub> ] <sup>+</sup>  | 147.1161    | 147.1168         | -4.8           |
| [C <sub>10</sub> H <sub>15</sub> ] <sup>+</sup>  | 135.1155    | 135.1168         | -9.6           |
| [C <sub>9</sub> H <sub>11</sub> ] <sup>+</sup>   | 119.0847    | 119.0855         | -6.7           |
| [C <sub>8</sub> H <sub>11</sub> ] <sup>+</sup>   | 107.0852    | 107.0855         | -2.8           |
| [C <sub>7</sub> H <sub>11</sub> ] <sup>+</sup>   | 95.0852     | 95.0855          | -3.2           |
| [C <sub>6</sub> H <sub>9</sub> ] <sup>+</sup>    | 81.0696     | 81.0699          | -3.7           |
| [C <sub>5</sub> H <sub>7</sub> ] <sup>+</sup>    | 67.0541     | 67.0542          | -1.5           |
| [C <sub>4</sub> H <sub>7</sub> ] <sup>+</sup>    | 55.0540     | 55.0542          | -3.6           |
| [C <sub>2</sub> H <sub>3</sub> O] <sup>+</sup>   | 43.0181     | 43.0178          | +7.0           |

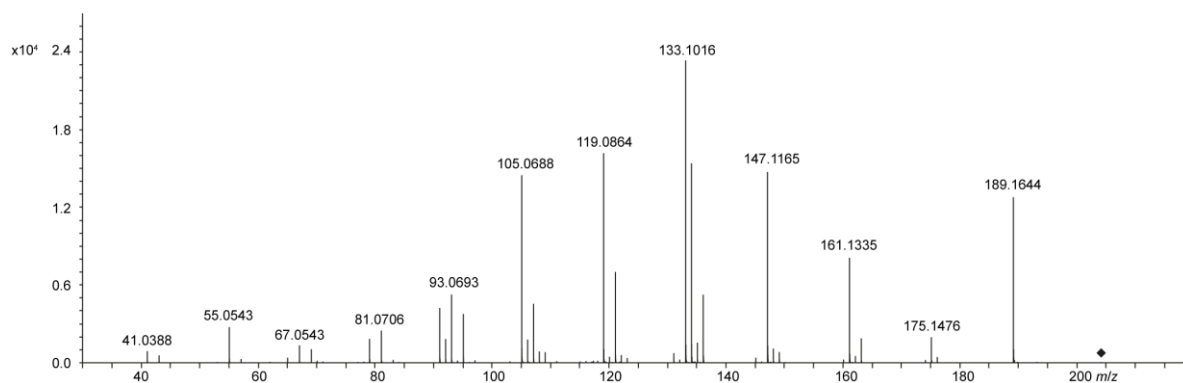

**Figure S10:** MS<sup>2</sup> for  $m/z = 204$  of **4**.

**Table S9:** Elemental compositions of fragment ions in Figure S10.

| molecular formula                               | $m/z$ found | $m/z$ calculated | $\Delta$ (ppm) |
|-------------------------------------------------|-------------|------------------|----------------|
| [C <sub>14</sub> H <sub>21</sub> ] <sup>+</sup> | 189.1644    | 189.1638         | +3.2           |
| [C <sub>13</sub> H <sub>19</sub> ] <sup>+</sup> | 175.1476    | 175.1482         | -3.4           |
| [C <sub>12</sub> H <sub>17</sub> ] <sup>+</sup> | 161.1335    | 161.1325         | +6.2           |
| [C <sub>11</sub> H <sub>15</sub> ] <sup>+</sup> | 147.1165    | 147.1168         | -2.4           |
| [C <sub>10</sub> H <sub>13</sub> ] <sup>+</sup> | 133.1016    | 133.1012         | +3.0           |
| [C <sub>9</sub> H <sub>11</sub> ] <sup>+</sup>  | 119.0864    | 119.0855         | +7.6           |
| [C <sub>8</sub> H <sub>9</sub> ] <sup>+</sup>   | 105.0688    | 105.0699         | -10.5          |
| [C <sub>7</sub> H <sub>9</sub> ] <sup>+</sup>   | 93.0693     | 93.0699          | -6.4           |
| [C <sub>6</sub> H <sub>9</sub> ] <sup>+</sup>   | 81.0706     | 81.0699          | +8.6           |
| [C <sub>5</sub> H <sub>7</sub> ] <sup>+</sup>   | 67.0543     | 67.0542          | +1.5           |
| [C <sub>4</sub> H <sub>7</sub> ] <sup>+</sup>   | 55.0543     | 55.0542          | +1.8           |
| [C <sub>3</sub> H <sub>5</sub> ] <sup>+</sup>   | 41.0388     | 41.0386          | +4.9           |
